# Supplementary material for: Metagenomic Analysis of Respiratory Tract DNA Viral Communities in Cystic Fibrosis and Non-Cystic Fibrosis Individuals
Source: PubMed Central journal article supplement (PMC2756586; doi:10.1371/journal.pone.0007370), 2009-10-09

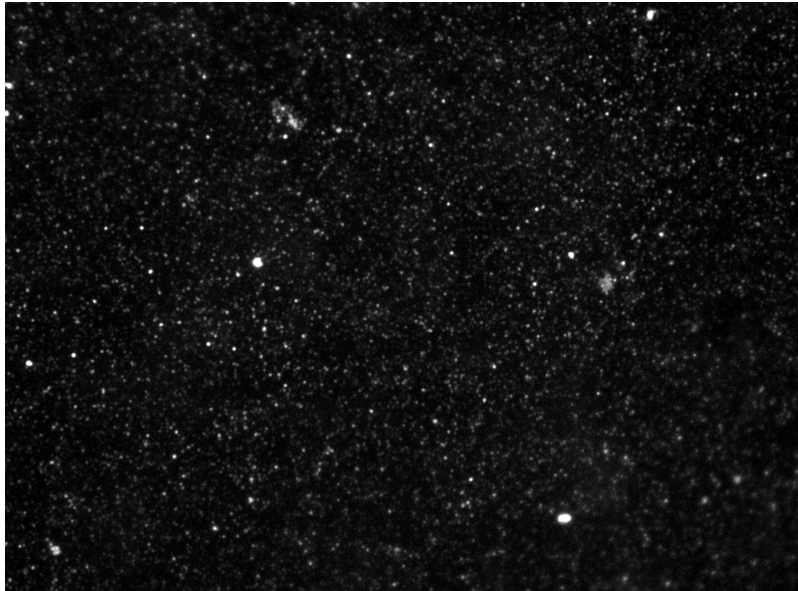

Supplement: pone.0007370.s011.pdf [file pone.0007370.s011.pdf]
